# Supplementary material for: Self-digitization chip for quantitative detection of human papillomavirus gene using digital LAMP
Source: Royal Society of Chemistry journal article supplement (doi:10.1039/c8lc01223g), 2019-01-01
Supplement: c8lc01223g1.pdf [file c8lc01223g1.pdf]

## Self-Digitization Chip for Quantitative Detection of Human Papillomavirus Using Digital LAMP

Jason E. Kreutz,<sup>a‡</sup> Jiasi Wang,<sup>a‡</sup> Allison M. Sheen,<sup>a‡</sup> Alison M. Thompson,<sup>b</sup> Jeannette P. Staheli,<sup>c</sup> Michael R. Dyen,<sup>c</sup> Qinghua Feng<sup>d</sup> and Daniel T. Chiu<sup>\*a</sup>

a. Department of Chemistry, University of Washington, Seattle, Washington 98195, United States.

b. Fred Hutchinson Cancer Research Center, Seattle, Washington 98109, United States.

c. Center for Global Infectious Disease Research, Seattle Children's Research Institute, Seattle, WA, USA

d. FIDALAB, Seattle, WA, USA

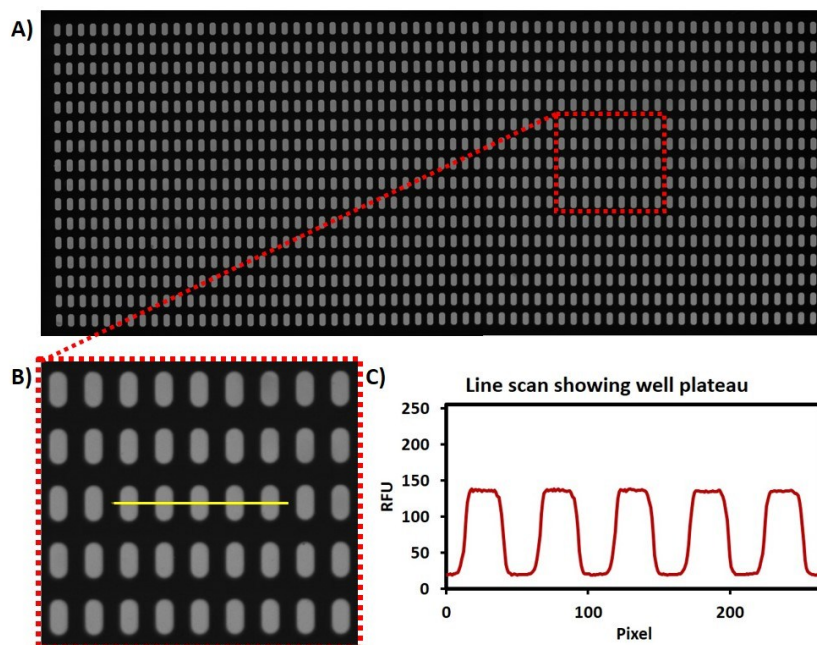

**Figure S1.** (A) Fluorescent image of SD chip with 1024 wells with well volumes of 7.5 nL. (B) Enlargement showing wells and line scan. (C) The line scan shows plateaus where the well is full vertically.

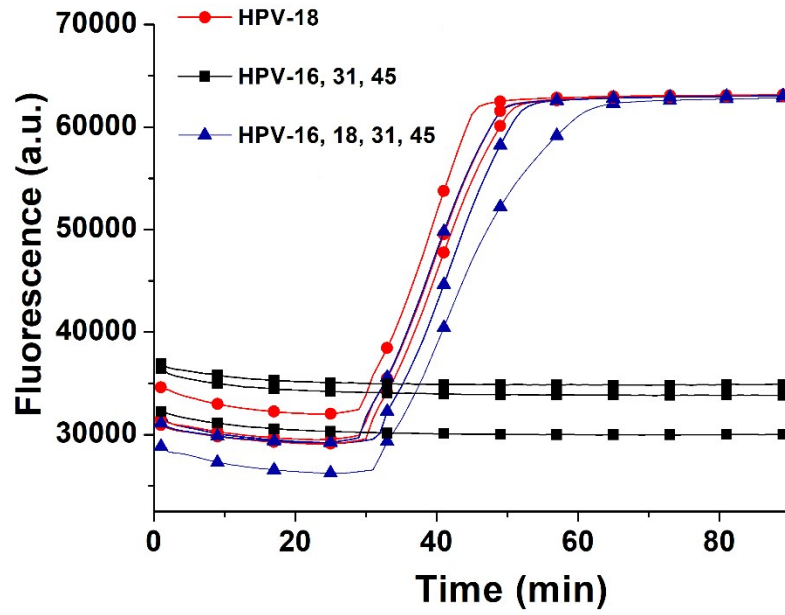

**Figure S2.** Real-time LAMP curves from samples described in Figure 4C. The concentrations are listed in the same order as in Figure 4C for Devices 3 and 7, and also the control sample containing HPV-16, 31 and 45. Each sample was repeated three times. The red curve with a circle marker contained HPV-18 at  $3.1 \times 10^4$  molecules/mL. The black curve with a square marker contained HPV-16, 31 and 45 at  $3.1 \times 10^4$  molecules/mL and showed no fluorescence increase. The blue curve with a triangle marker contained all four HPV plasmids at  $3.1 \times 10^4$  molecules/mL, and showed an increase in fluorescence a little later than the sample containing only HPV-18 at  $3.1 \times 10^4$  molecules/mL.

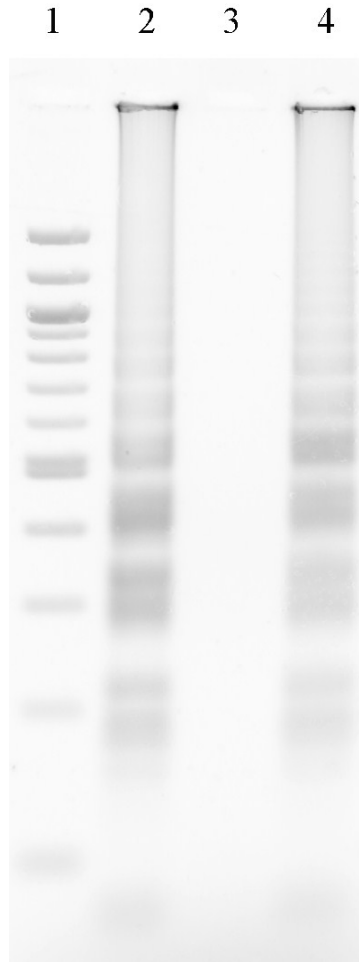

**Figure S3.** The agarose gel electrophoresis results from samples in **Figure S2**. Line 1 is the DNA marker ladder. Line 2 is the sample that contained HPV-18 at  $3.1 \times 10^4$  molecules/mL, showing the typical ladder of amplified LAMP products. Line 3 is the sample that contained HPV-16, 31 and 45 at  $3.1 \times 10^4$  molecules/mL, showing no amplified products. Line 4 is the sample that contained all four HPV plasmids including HPV18 at  $3.1 \times 10^4$  molecules/mL.
